# Supplementary material
Source: PubMed Central journal article supplement (PMC4879303)
Supplement: JCM.03133-15_zjm999095008so1.pdf [file JCM.03133-15_zjm999095008so1.pdf]

**Supplementary Table 1. Primer and probe sequences used in this case-control study**

| Usage                | Primer/Probe | Nucleotide Sequence (5'-3') | Position               | Reference |
|----------------------|--------------|-----------------------------|------------------------|-----------|
| Real-time PCR        | Sav 1F       | TTGGCCCTCGCCACCTAC          | 5077-5094 <sup>a</sup> | 1         |
|                      | Sav 5F       | TTTGAACAAGCTGTGGCATGCTAC    | 5112-5135 <sup>a</sup> |           |
|                      | Sav124 F     | GAYCASGCTCTCGCYACCTAC       | 5074-5094 <sup>a</sup> |           |
|                      | Sav1245 R    | CCCTCCATYTCAAACACTA         | 5159-5177 <sup>a</sup> |           |
|                      | Sav124 probe | VIC-CCRCCTATRAACCA-MGB      | 5101-5117 <sup>a</sup> |           |
|                      | Sav5 probe   | VIC-TGCCACCAATGTACCA-MGB    | 5142-5157 <sup>b</sup> |           |
| Genotyping           | SV-F13       | GAYYWGGCYCTCGCYACCTAC       | 5074-5094 <sup>a</sup> | 2         |
|                      | SV-F14       | GAACAAGCTGTGGCATGCTAC       | 5074-5094 <sup>a</sup> |           |
|                      | SaVF1245     | TAGTGTGGARATGGAGGG          | 5159-5177 <sup>a</sup> |           |
|                      | SaV5857R-1   | CWGGDGANAYHCCATTBTCCAT      | 5857-5878 <sup>a</sup> |           |
|                      | SaV5857R-2   | GGNGANMNNCCRTTNTSCAT        | 5857-5876 <sup>a</sup> |           |
| Amplification of VP1 | SV-F13       | GAYYWGGCYCTCGCYACCTAC       | 5074-5094 <sup>a</sup> | Current   |
|                      | SV-F14       | GAACAAGCTGTGGCATGCTAC       | 5074-5094 <sup>a</sup> | study     |
|                      | SaVGHIR      | GCTCCWGTRAACCAAGACATTATTC   | 6851-6875 <sup>c</sup> |           |

- a. Position in complete sapovirus GI genogroup sequence (Manchester, X86560)
- b. Position in complete genome of sapovirus GV genogroup (NongKhai-24/Thailand, AY646856)
- c. Position in complete genome of GII genogroup (Bristol/98/UK, AJ249939)

1. **Oka T, Katayama K, Hansman GS, Kageyama T, Ogawa S, Wu FT, White PA,**

**Takeda N.** 2006. Detection of human sapovirus by real-time reverse transcription-polymerase chain reaction. *J Med Virol* 78:1347-1353.

2. **Okada M, Yamashita Y, Oseto M, Shinozaki K.** 2006. The detection of human sapoviruses with universal and genogroup-specific primers. *Arch Virol* 151:2503-2509.

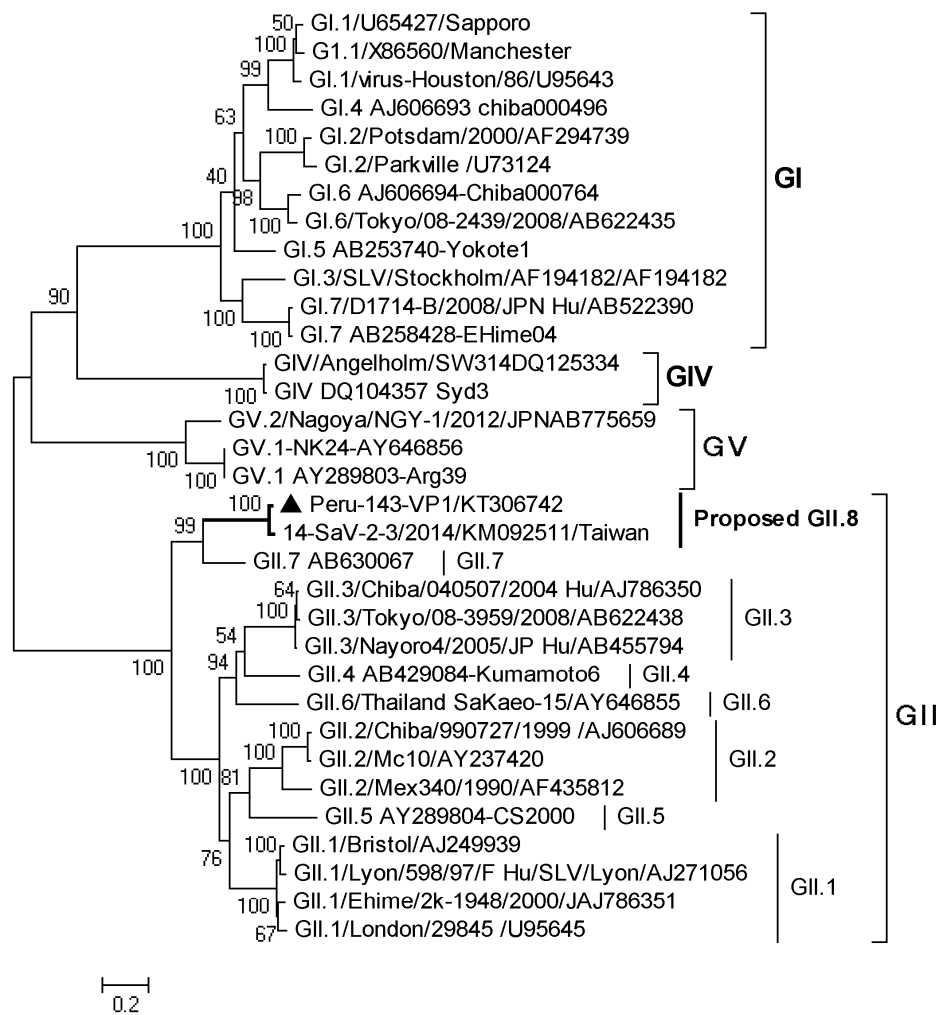

**Supplementary Figure 1. Phylogenetic analysis of full VP1 nucleotide sequences of sapovirus.**

The phylogenetic tree was inferred using the maximum likelihood method (Kimura 2-parameter model) using MEGA5. The tree was drawn to scale, with branch lengths measured in the number of substitutions per site. The VP1 obtained in this study is marked with a filled triangle.
